# Supplementary material for: Effect of methacrylic acid and pendant vinyl groups on the mechanical properties of highly stretchable core–shell nanostructured films deposited from water
Source: Royal Society of Chemistry journal article supplement (doi:10.1039/d0py00971g), 2020-12-17
Supplement: d0py00971g1.pdf [file d0py00971g1.pdf]

**SUPPORTING INFORMATION FOR**

**Effects of methacrylic acid and pendant vinyl groups on the  
mechanical properties of highly stretchable core-shell  
nanostructured films deposited from water**

James Turton<sup>\*a</sup>, Stephen Worrall<sup>b</sup>, Muhamad S. Musa<sup>c</sup>, Amir H. Milani<sup>a,\*</sup>, Yichao Yao<sup>a</sup>, Peter Shaw<sup>c</sup>,  
David Ring<sup>c</sup> and Brian R. Saunders<sup>a,\*</sup>

<sup>a</sup> *Department of Materials, MSS Tower, The University of Manchester, Manchester, M1 3BB, U.K.* <sup>b</sup> *Aston  
Institute of Materials Research, School of Engineering and Applied Science, Aston University, Birmingham, B4  
7ET, U.K.* <sup>c</sup> *Synthomer (UK) Ltd, Temple Fields, Harlow, Essex, CM20 2BH, U.K.*

## Vinyl functionalisation of the particles via ring-opening epoxide reaction

Scheme S1A shows the overall vinyl-functionalisation reaction with one of the possible products. The reaction mechanism shown in Scheme S1B is based on that reported by Reis et al.<sup>1</sup> The first step is the transfer of a proton to glycidyl methacrylate (GMA). Then, ring-opening by the OH group occurs by nucleophilic attack at the A and / or B carbons. This results in two possible isomers, which are both shown. Reis et al. were not able to determine which of the isomers is more favourable. The carbon labelled A is less sterically hindered and would seem more likely to react. Consequently, we depict the isomer from path A in this work. We note that the isomer from path B may also be present.

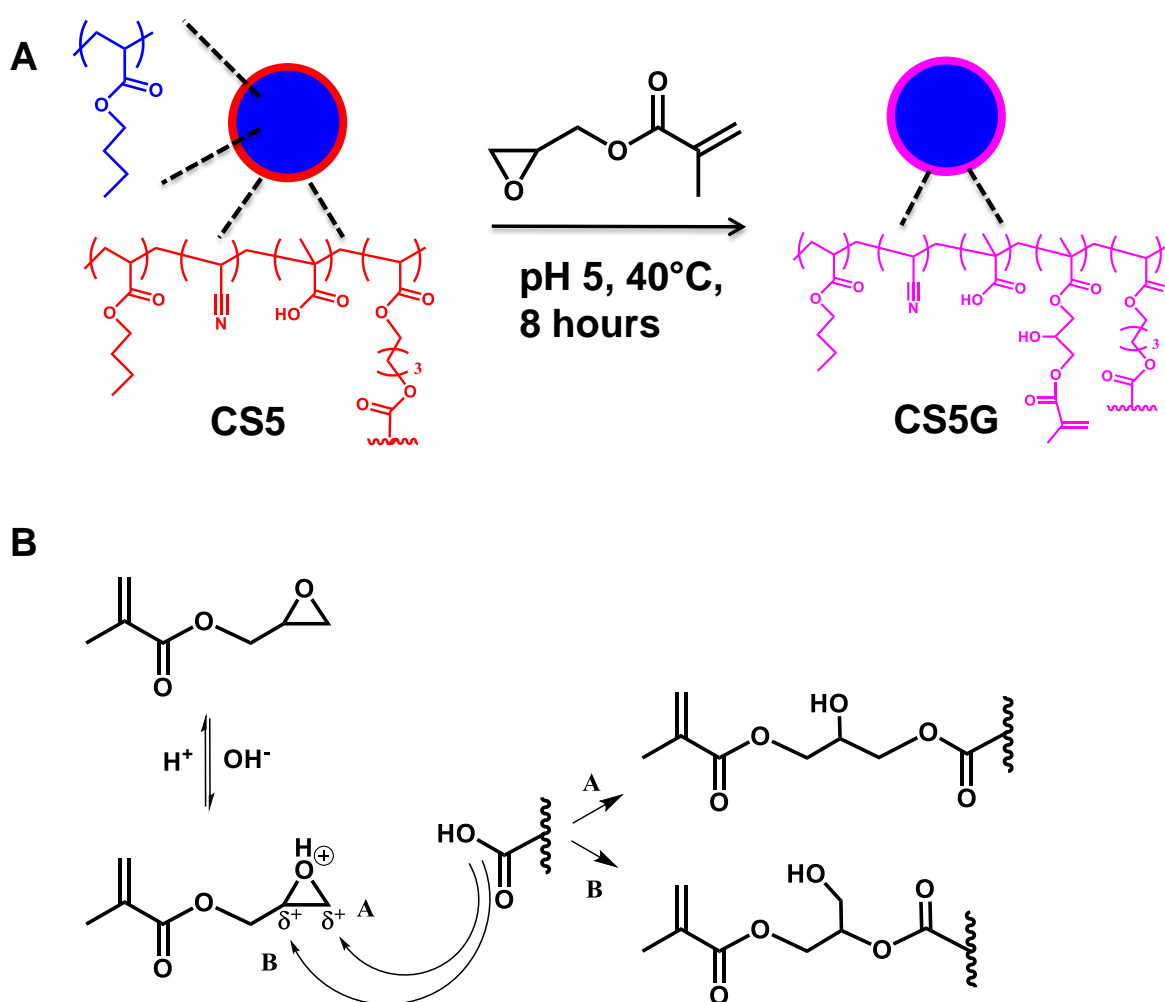

**Scheme S1. A.** Depiction of the method used for the GMA functionalisation of CS5 nanoparticles to prepare CS5G nanoparticles. **B.** Mechanism for epoxide ring-opening reaction.

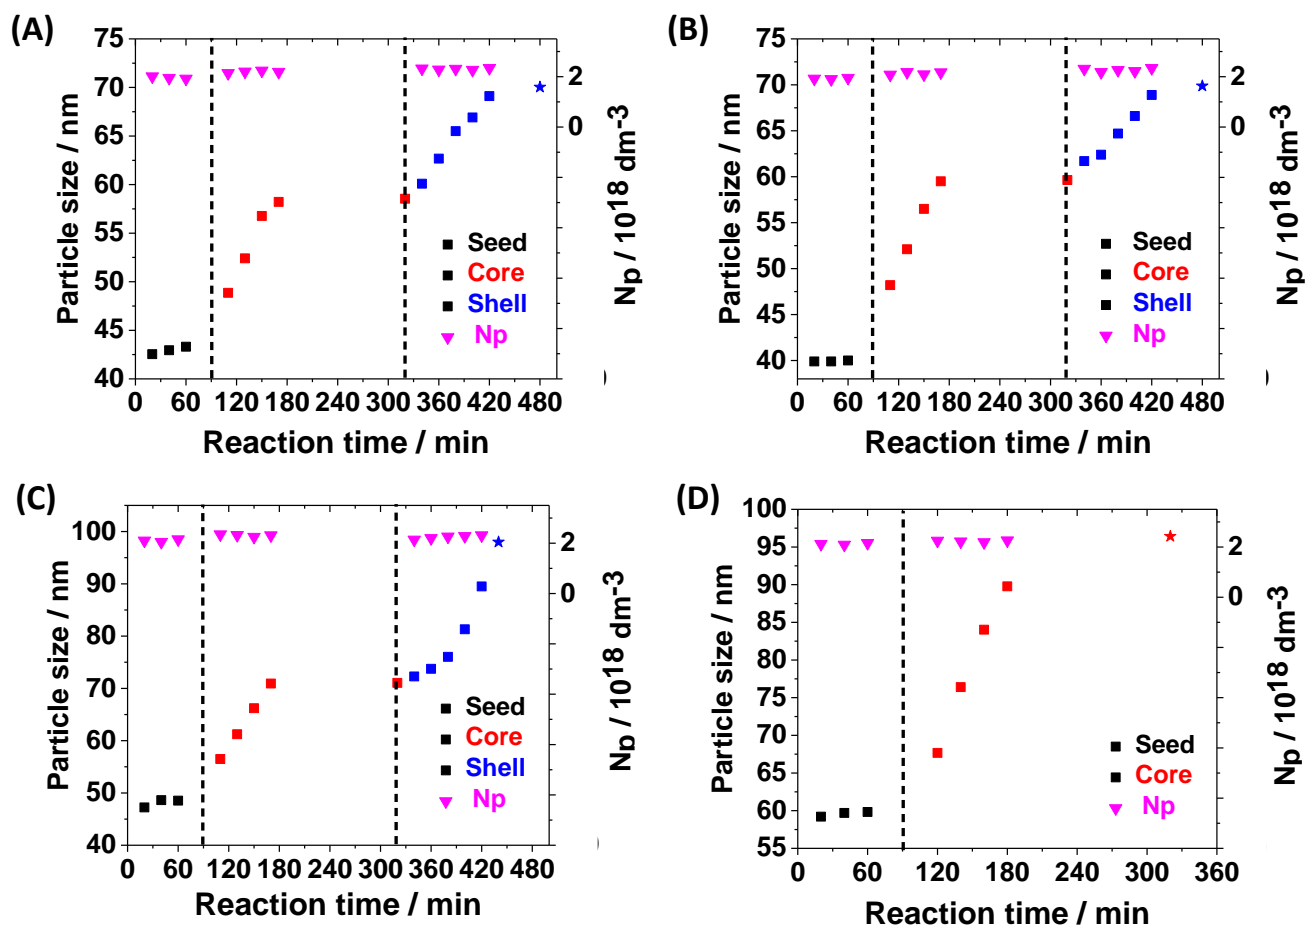

**Fig. S1.** z-average particle size and number density of particles ( $N_p$ ) versus preparation time for (A) CS0, (B) CS2.5, (C) CS10 core-shell and (D) NP5 systems. The stars show the final  $d$  values.

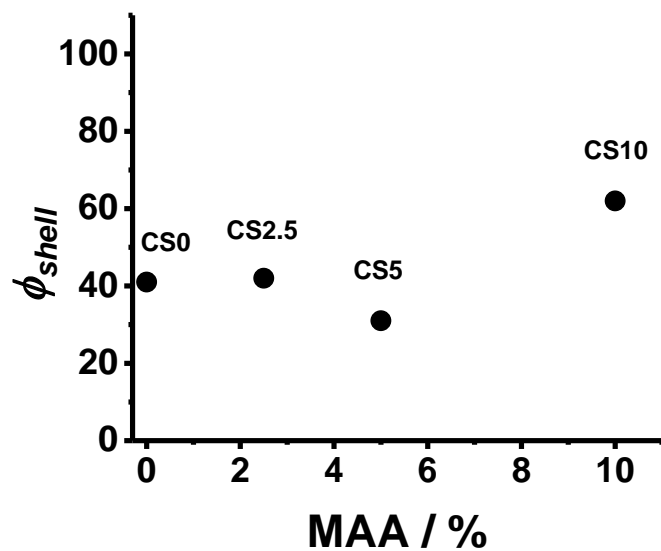

**Fig. S2.** Variation of shell volume fraction with MAA content used during preparation. The identities of the nanoparticles are shown.

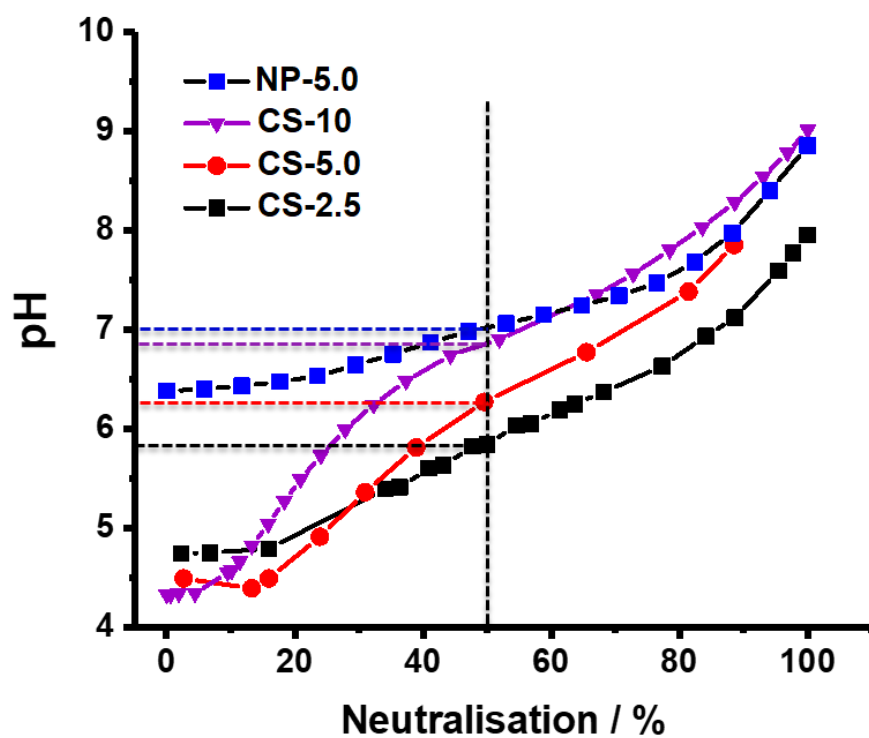

**Fig. S3.** Potentiometric titration data for various nanoparticle dispersions. The apparent  $pK_a$  values were determined from the pH values at 50 % neutralisation which is represented by the dotted lines.

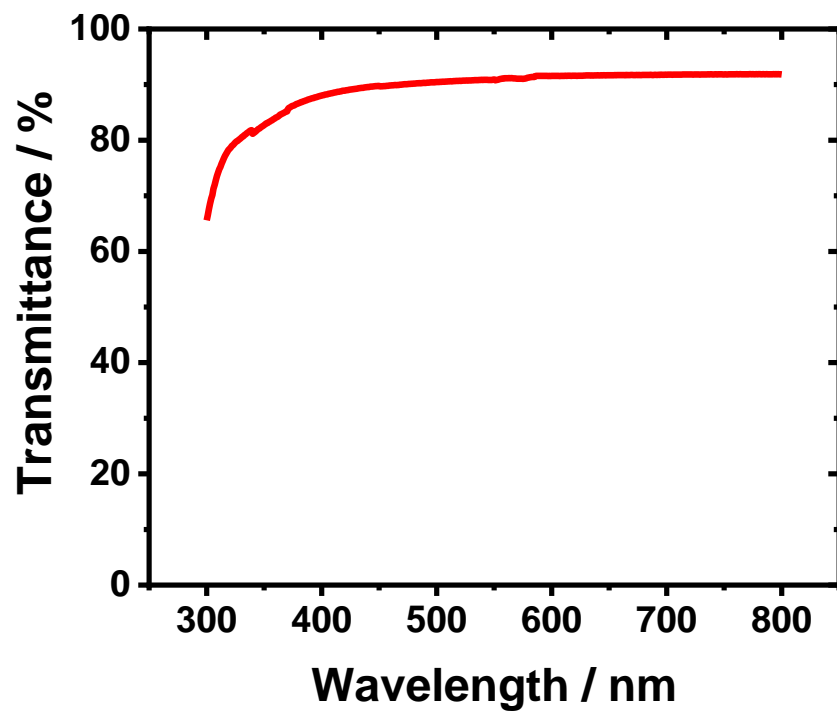

**Fig. S4.** Transmittance versus wavelength for the CS5 film shown in Scheme 1A.

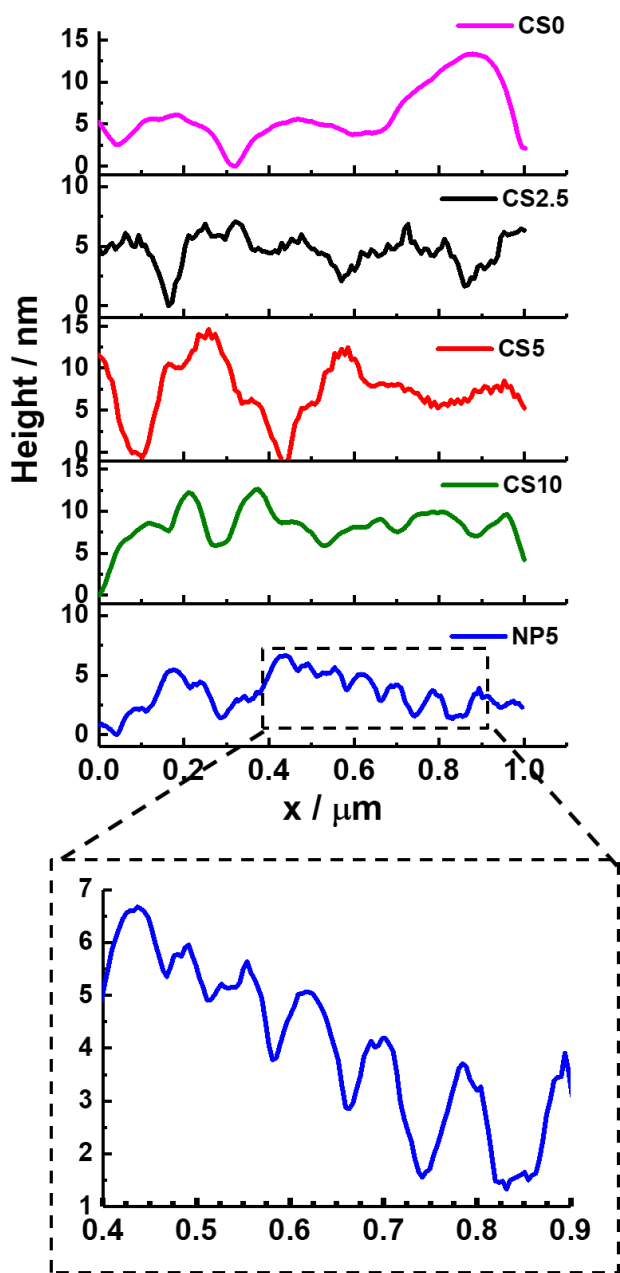

**Fig. S5.** Line profiles from height mode AFM images in Fig. 3 for various films.

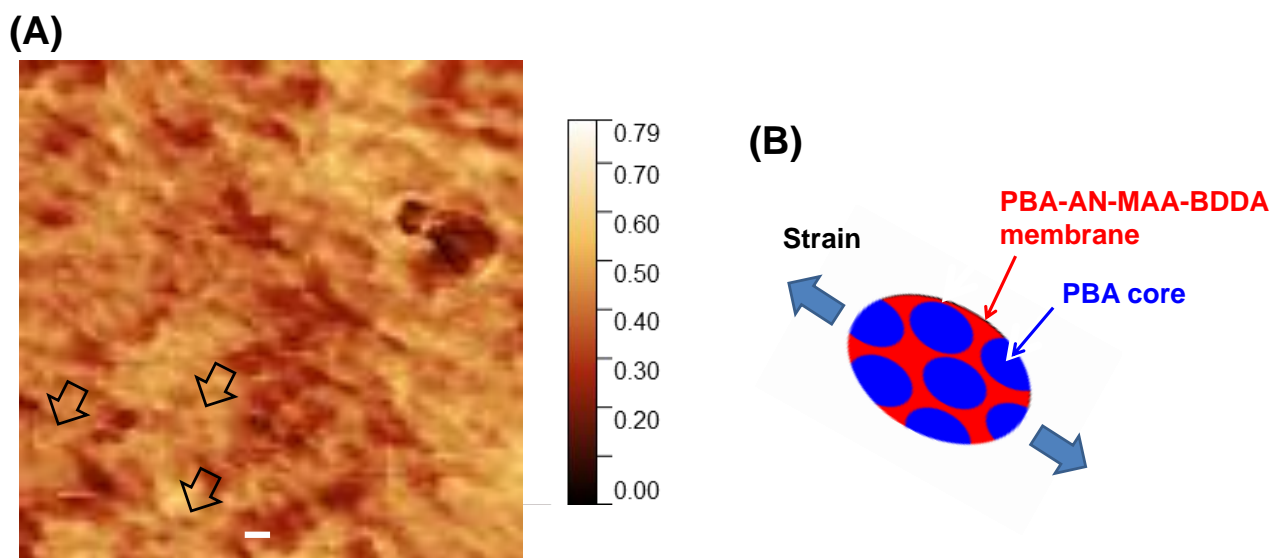

**Fig. S6.** (A) AFM log stiffness image for the CS10 film. The black arrows highlight the membrane morphology. The shells are elongated in a preferred direction indicating that the film had been subjected to unintentional strain during processing. Scale bar: 200 nm. (B) Depiction of a segment of film showing the strained polymer cores within the membrane formed from inter-meshed shells.



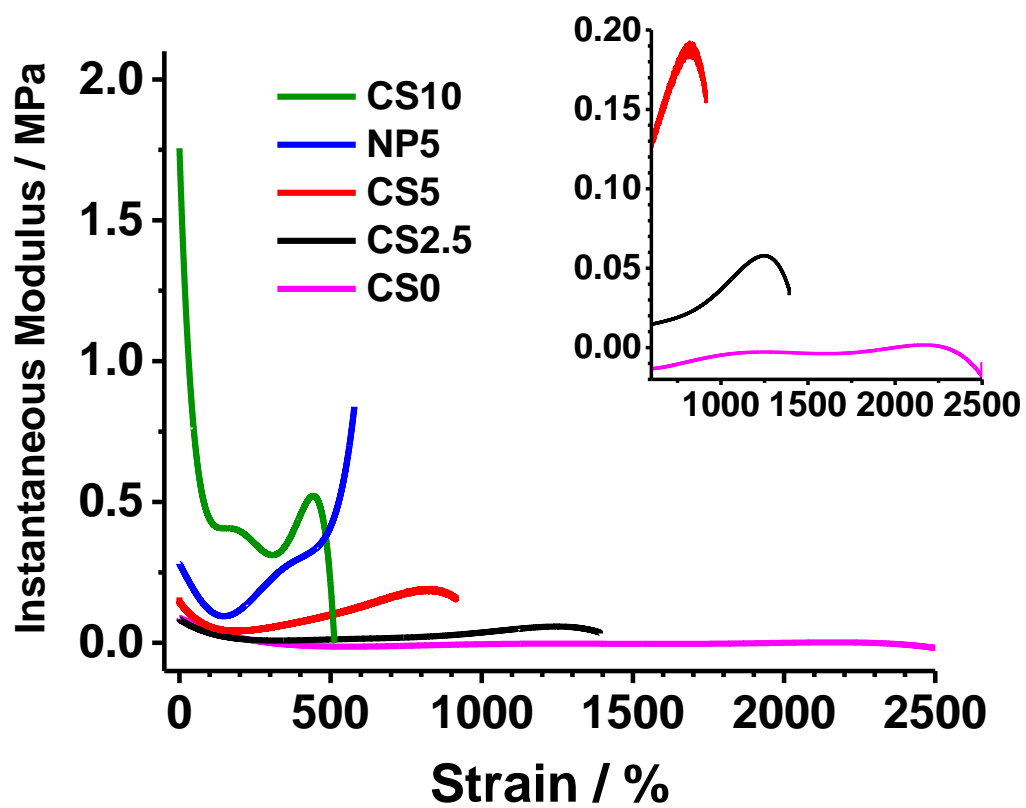

**Fig. S7.** Instantaneous modulus (or tangent modulus) values obtained from the data shown in Fig. 5A.

These values were calculated using the local gradients of the stress-strain data.

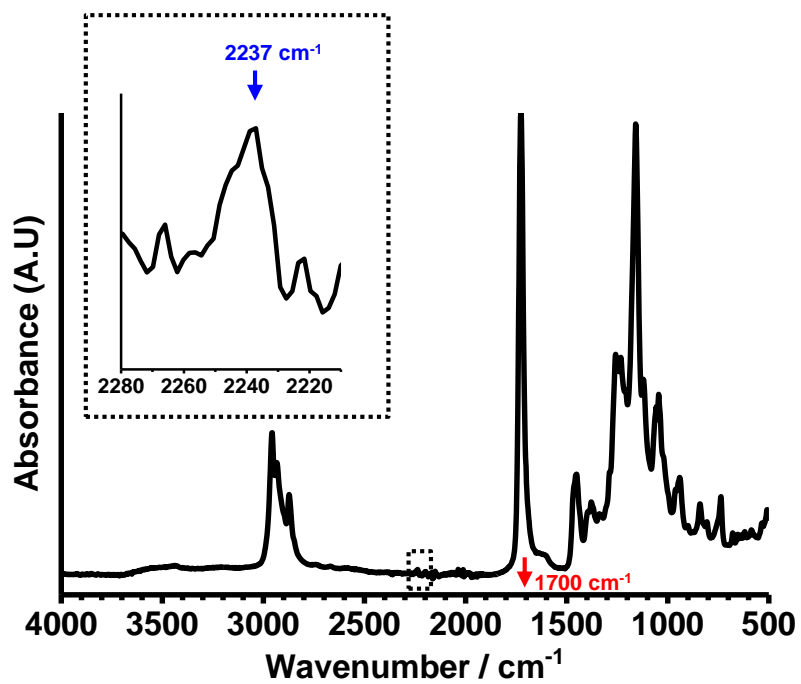

**Fig. S8.** FTIR spectrum of the CS5 film. Bonds due to  $\text{-C}\equiv\text{N}$  and hydrogen bonded  $\text{-C=O}$  groups are expected at  $2237$  and  $1700\text{ cm}^{-1}$ , respectively. See text in the main paper for discussion.

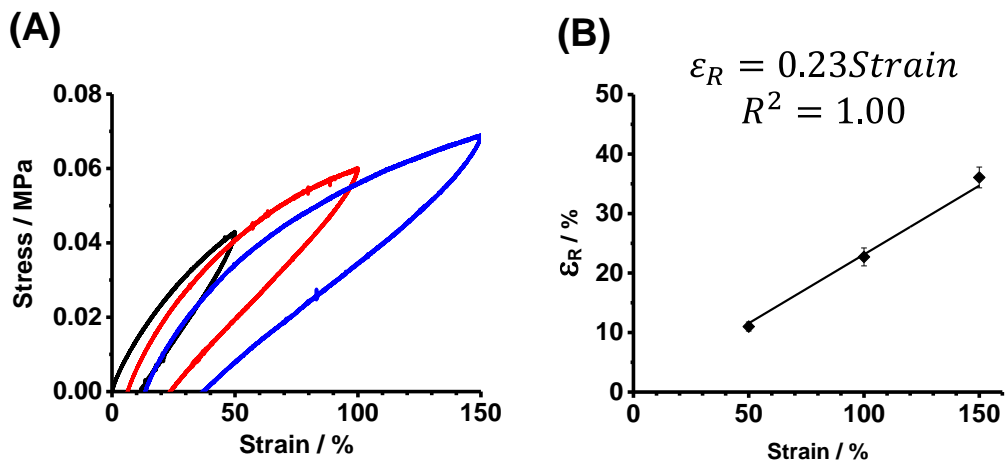

**Fig. S9.** (A) Dynamic tensile stress-strain data and (B) Residual strain vs. strain from (A) for CS5 films.

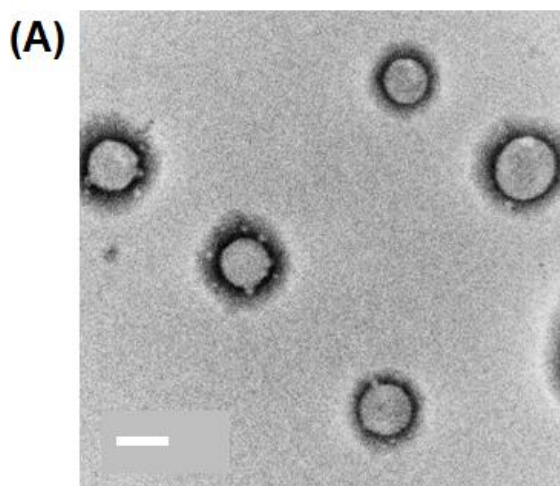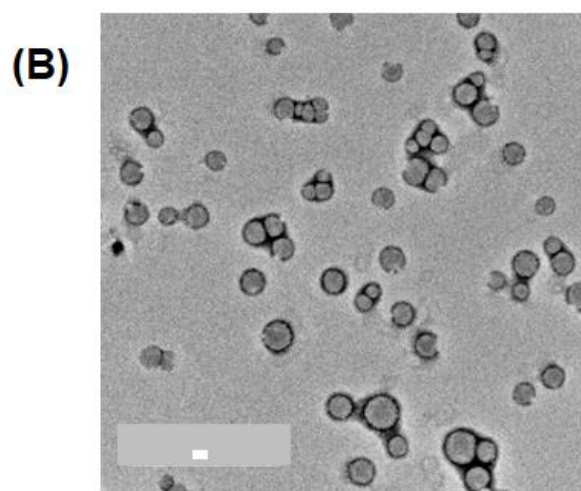

**Fig. S10.** TEM data for CS5G particles. Higher and lower magnification images are shown in (A) and (B), respectively. The scale bars are 100 nm

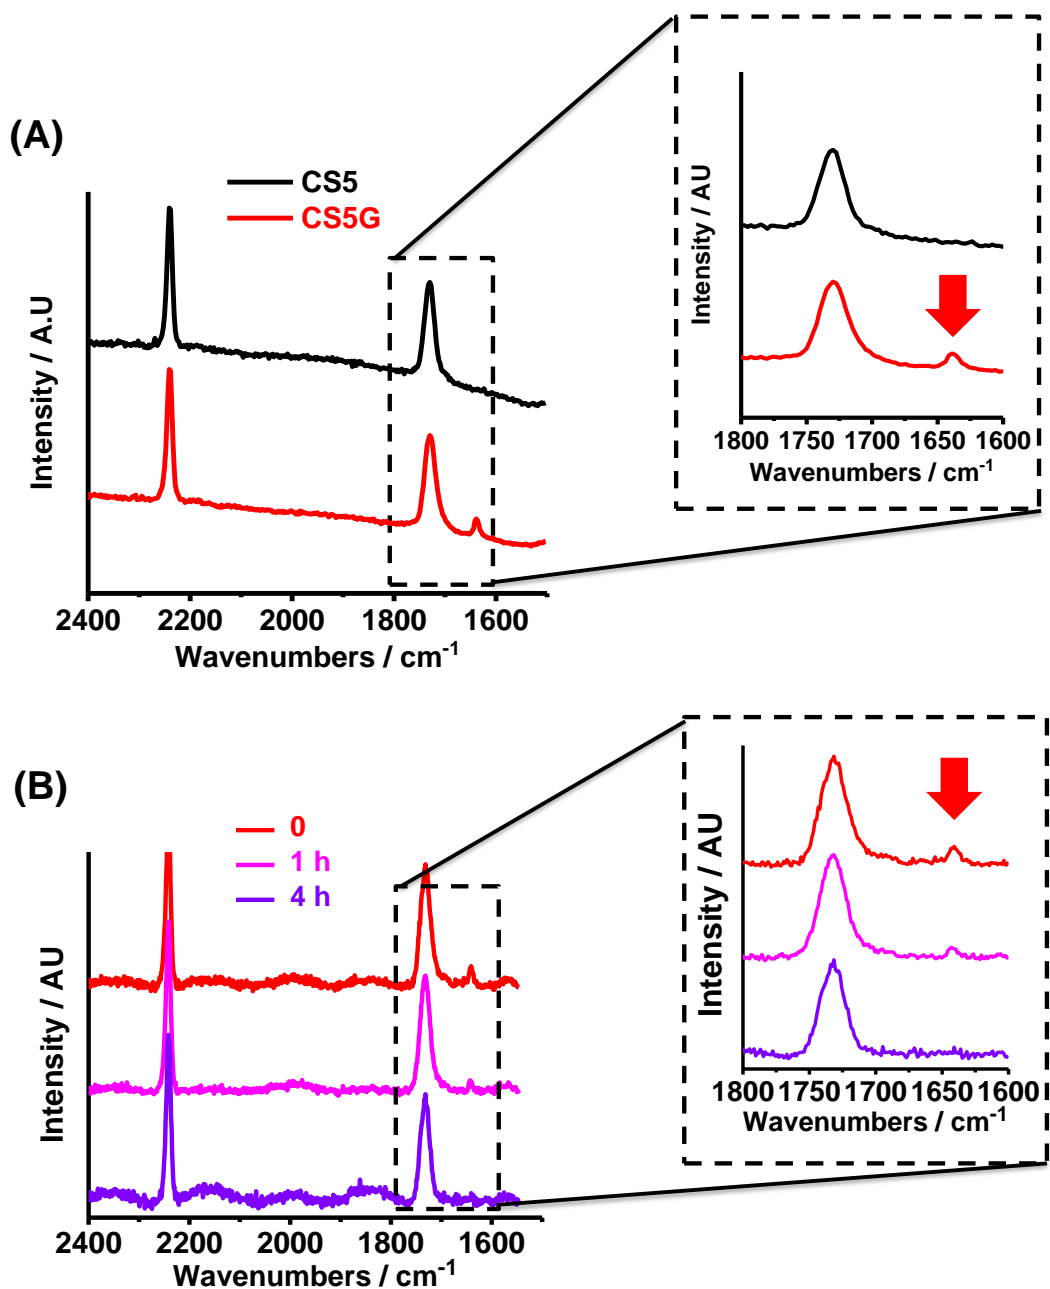

**Fig. S11.** (A) Raman spectra showing both CS5 and CS5G films. A vinyl peak is evident (arrow). (B) Raman spectra for a CS5G film before and after heating at 90 °C for 1 and 4 h. The vinyl peak disappears due to crosslinking when the film is heated for 4 h.

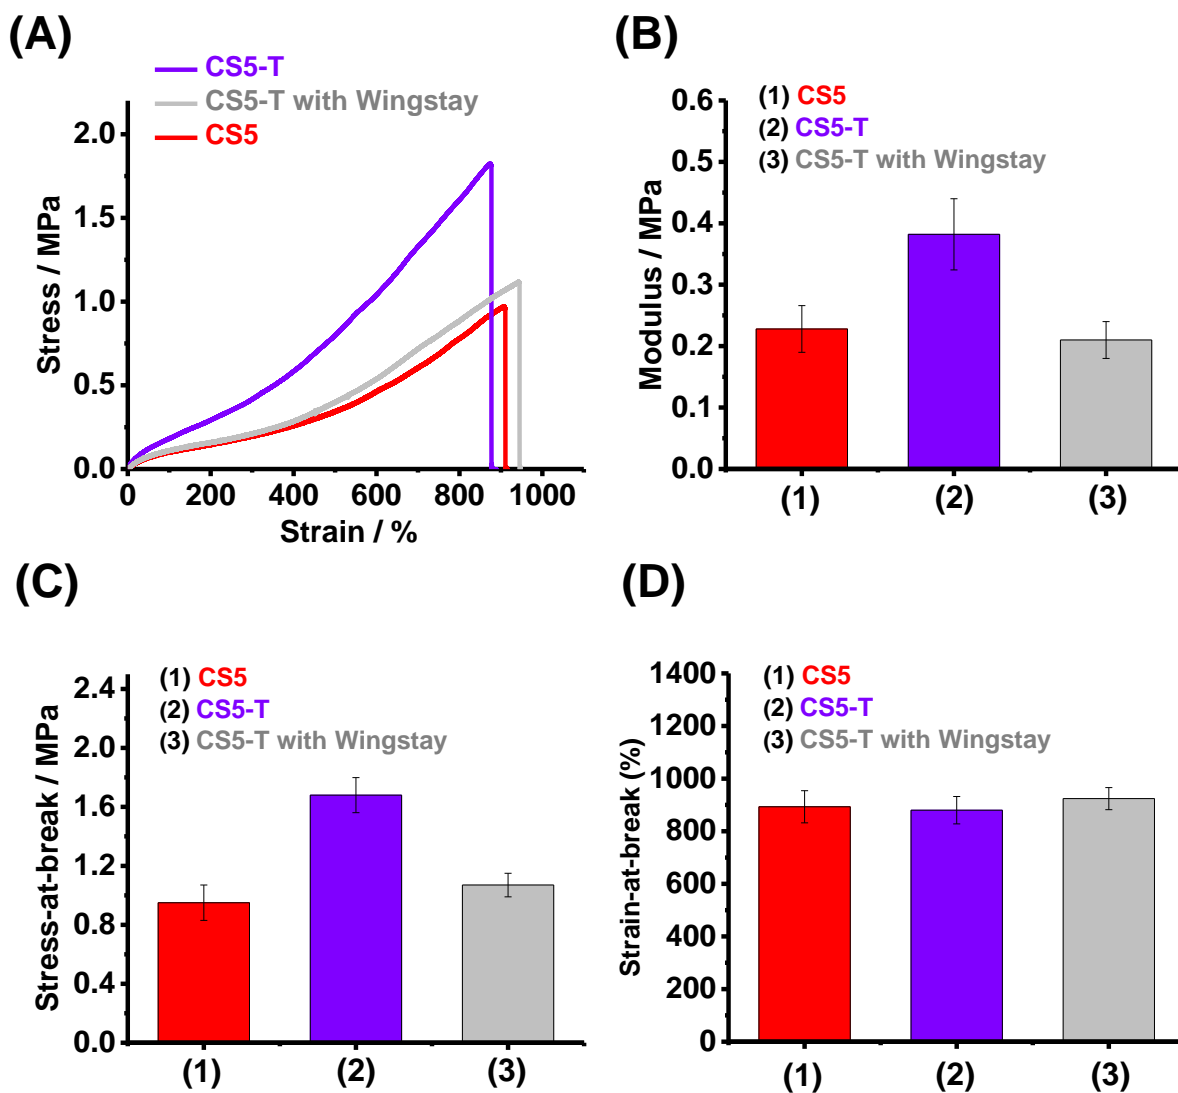

**Fig. S12.** (A) Stress/strain curves for CS5 films heated at 90 °C for 4 h (denoted as CS5-T) and with added Wingstay-L. The effects of heating in the absence and presence of Wingstay-L on the (B) modulus, (C) stress-at-break and (D) strain-at-break are shown.

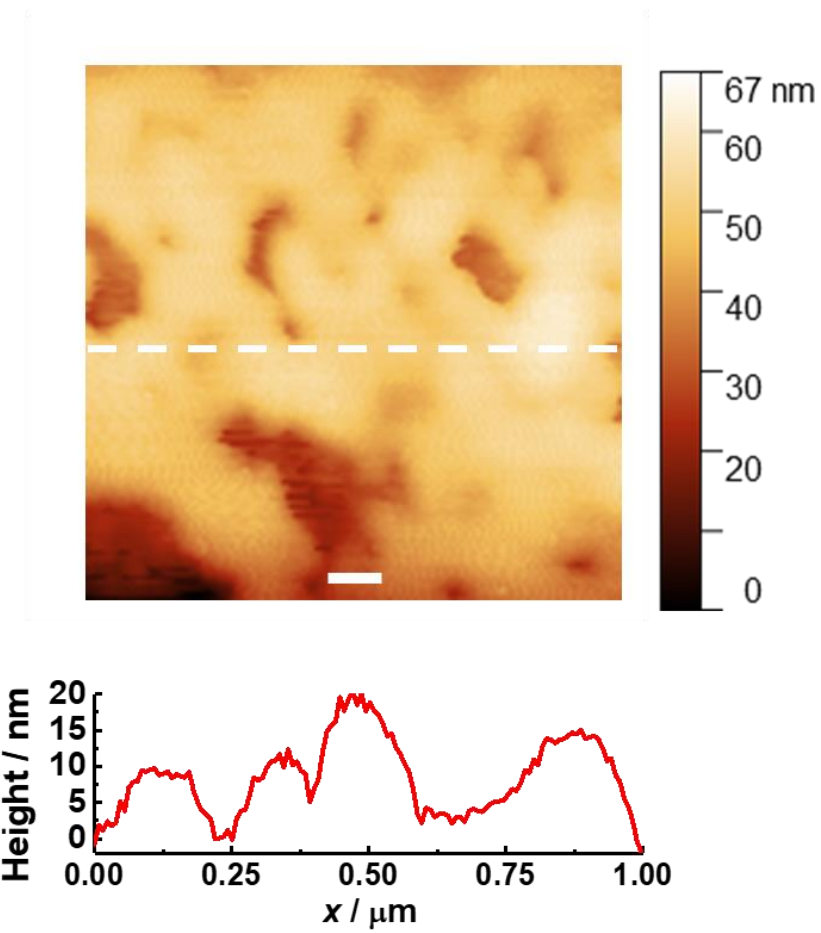

**Fig. S13.** AFM height image and line profile for CS5G film. The scale bar is 100 nm.

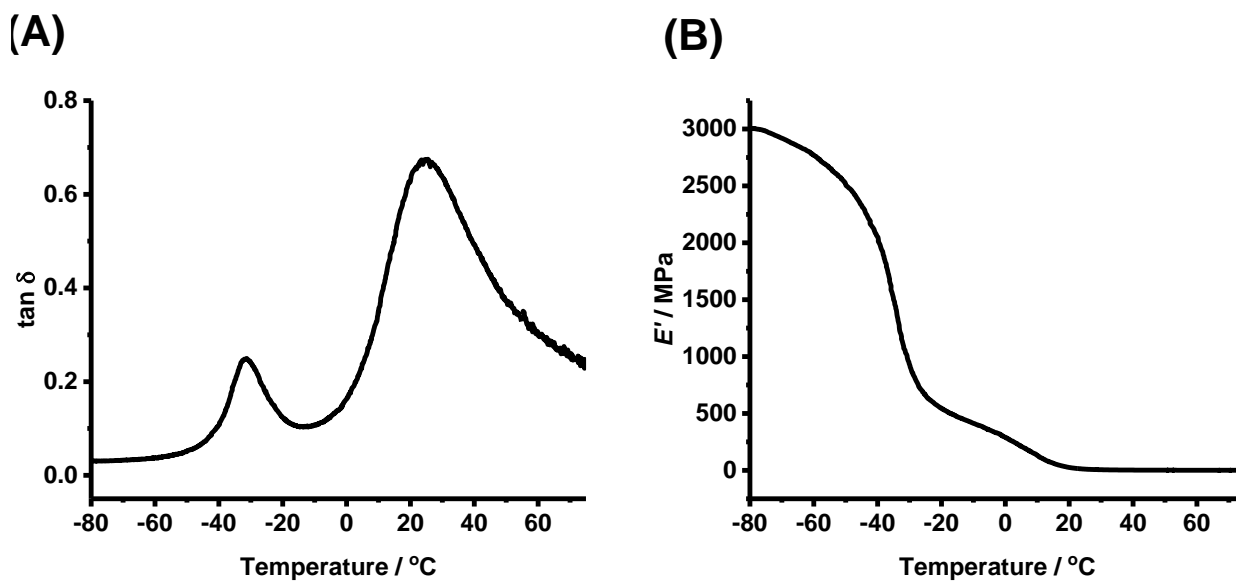

**Fig. S14.** Temperature-dependent (A)  $\tan \delta$  ( $= E''/E'$ , where  $E''$  and  $E'$  are the loss and storage modulus, respectively) and (B)  $E'$  values for a CS5G film.



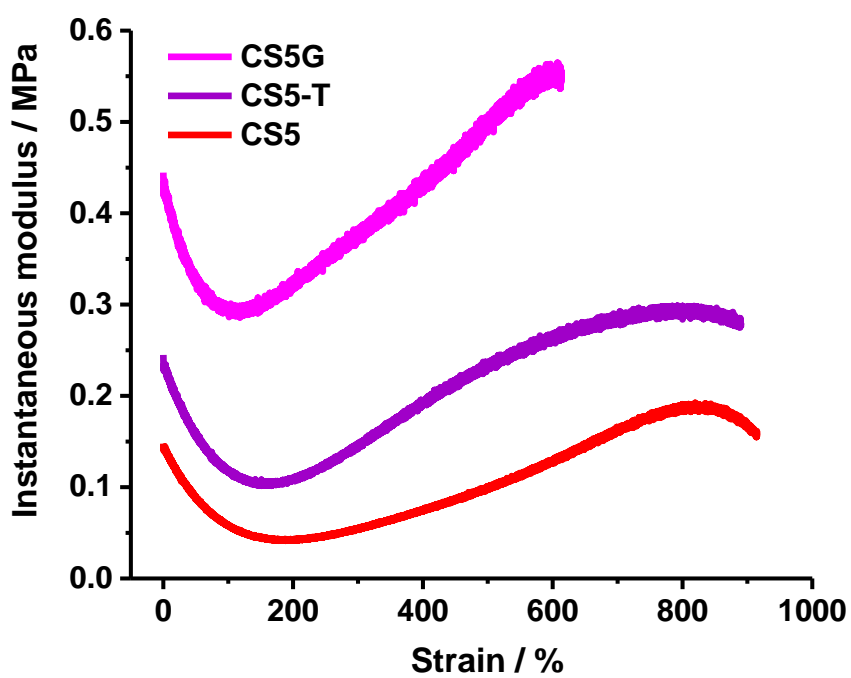

**Fig. S15.** Instantaneous modulus as a function of strain for CS5G, CS5-T and CS5 films. The data were obtained from Fig. 7A and Fig. 5A.

**Table S1.** Monomer masses used to prepare the CSx nanoparticles

|               | <b>Seed</b>        | <b>Core</b>        | <b>Shell</b>       |                    |                     |                      |
|---------------|--------------------|--------------------|--------------------|--------------------|---------------------|----------------------|
| <b>System</b> | <b>BA mass / g</b> | <b>BA mass / g</b> | <b>BA mass / g</b> | <b>AN mass / g</b> | <b>MAA mass / g</b> | <b>BDDA mass / g</b> |
| CS0           | 13.5               | 59.38              | 43.94              | 11.88              | -                   | 0.60                 |
| CS2.5         | 13.5               | 59.38              | 43.94              | 11.88              | 1.49                | 0.60                 |
| CS5.0         | 13.5               | 59.38              | 43.94              | 11.88              | 2.98                | 0.60                 |
| CS10          | 13.5               | 59.38              | 43.94              | 11.88              | 5.96                | 0.60                 |

**Table S2.** Properties of non-functionalised CS<sub>x</sub> nanoparticles

| System | $W_{MAA(th)}^{a/}$<br>wt% | $W_{MAA(exp)}^{b/}$<br>wt% | $pK_a^c$ | $D_{TEM}^d$<br>/nm [CV] | $d_c^e /$<br>nm | $d_{c-s}^f /$<br>nm | $\delta^g /$<br>nm | $\phi_{shell}^h /$<br>vol.% |
|--------|---------------------------|----------------------------|----------|-------------------------|-----------------|---------------------|--------------------|-----------------------------|
| CS0    | -                         | -                          | -        | 74 [9]                  | 58              | 69                  | 5.5                | 41                          |
| CS2.5  | 1.3                       | 1.4                        | 5.9      | 76 [11]                 | 60              | 72                  | 6                  | 42                          |
| CS5    | 2.5                       | 2.4                        | 6.3      | 78 [10]                 | 75              | 85                  | 5                  | 31                          |
| CS10   | 5.0                       | 4.7                        | 6.9      | 91 [11]                 | 71              | 98                  | 13.5               | 62                          |
| NP5    | 5.0                       | 6.6                        | 7.0      | 98 [10]                 | 60 <sup>i</sup> | 96 <sup>i</sup>     | -                  | 100                         |

<sup>a</sup> Theoretical particle MAA content determined from the preparation conditions employed. <sup>b</sup>

MAA content determined by potentiometric titration. <sup>c</sup> Apparent  $pK_a$  value which was taken from

the titration data at 50% neutralisation. <sup>d</sup> Number-average particle diameter from TEM. CV is

the coefficient of variation. <sup>e</sup> z-average diameter obtained from DLS data for the core particles. <sup>f</sup>

z-average diameter obtained from DLS data for the core-shell particles. <sup>g</sup> Shell thickness =  $(d_{c-s}$

-  $d_c)/2$ . <sup>h</sup> Shell volume fraction =  $1 - \{(d_c/d_{c-s})\}^3$ . <sup>i</sup> The NP5 system is considered homogeneous.

These values for  $d_c$  and  $d_{c-s}$  correspond to the  $d$  values after the first and second stages of growth from Fig. S1D.

## References

1. A. V. Reis, A. R. Fajardo, I. T. A. Schuquel, M. R. Guilherme, G. J. Vidotti, A. F. Rubira and E. C. Muniz, *J. Org. Chem.*, 2009, **74**, 3750-3757.
